# Supplementary material
Source: PubMed Central journal article supplement (PMC8159689)
Supplement: jci-131-143632-s152.pdf [file jci-131-143632-s152.pdf]

## **Supplemental Materials**

### **Histone deficiency and accelerated replication stress in T cell aging**

Chulwoo Kim, Jun Jin, Zhongde Ye, Rohit R. Jadhav, Claire E. Gustafson, Bin Hu,

Wenqiang Cao, Lu Tian, Cornelia M. Weyand, Jörg J. Goronzy

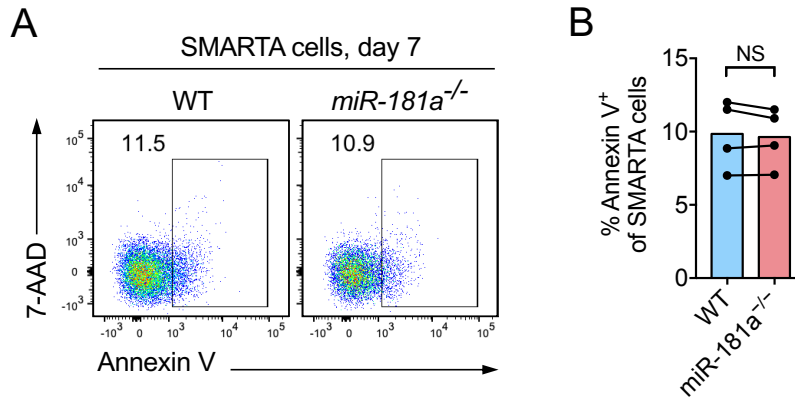

**Supplemental Figure 1. Reduced expansion of *miR-181a*-deficient T cells is not due to increased cell death. Related to Figure 1A.** Congenically marked WT and *miR-181a*<sup>-/-</sup> SMARTA cells were co-transferred into B6 mice before LCMV infection. **(A)** Representative flow plots of Annexin V and 7-AAD staining of SMARTA cells on day 7 after LCMV infection. **(B)** Summary data of the percentages of Annexin V<sup>+</sup> apoptotic cells (mean, two-tailed paired t test). Data are representative of two experiments with 4-5 mice per group. NS, not significant.

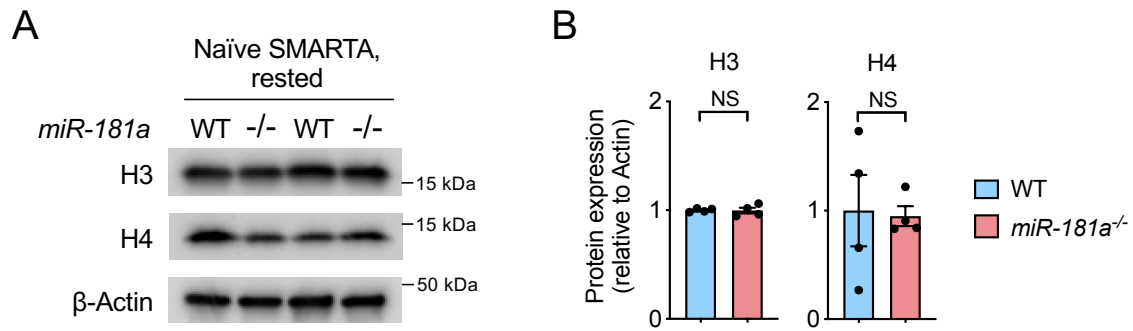

**Supplemental Figure 2. Comparison of histone expression in unstimulated naïve WT and *miR-181a*-deficient T cells. Related to Figure 1D. (A)** Immunoblots for histone H3 and H4 proteins from unstimulated naïve SMARTA cells. **(B)** Summary data of mean normalized intensities (n=4, mean  $\pm$  SEM, two-tailed unpaired t test). NS, not significant.

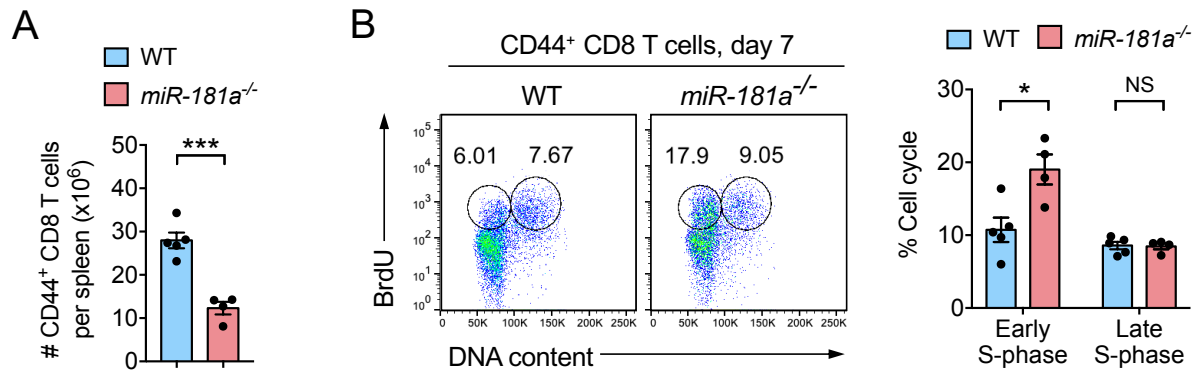

**Supplemental Figure 3. Proliferative defect and accumulation of *miR-181a*<sup>-/-</sup> CD8 T cells in the early S-phase of the cell cycle. Related to Figure 1, F and G.** On day 7 after LCMV infection, WT and *miR-181a*<sup>-/-</sup> mice were injected with BrdU for 1 hour prior to spleen harvest. **(A)** Numbers of CD44<sup>+</sup> CD8 T cells (mean  $\pm$  SEM, two-tailed unpaired t test). **(B)** Representative flow plots of BrdU incorporation and DNA content in CD44<sup>+</sup> CD8 T cells (left) and summary of frequencies (right, mean  $\pm$  SEM, two-tailed unpaired t test). Data are representative of two experiments with 3-6 mice per group. \*P<0.05, \*\*\*P<0.001, NS, not significant.

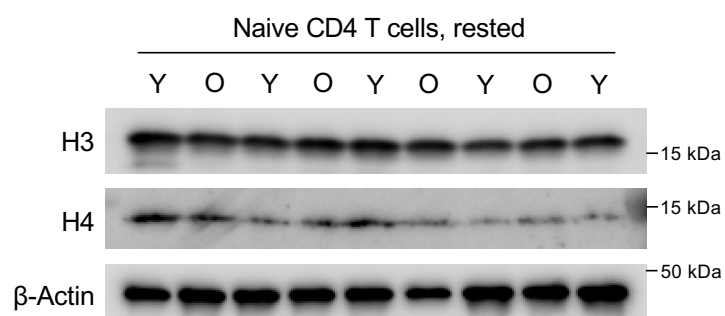

**Supplemental Figure 4. Comparison of histone expression in unstimulated naïve CD4 T cells from young and old adults. Related to Figure 2C.** Immunoblots for histone H3 and H4 in unstimulated naïve CD4 T cells from 5 young and 4 old individuals.

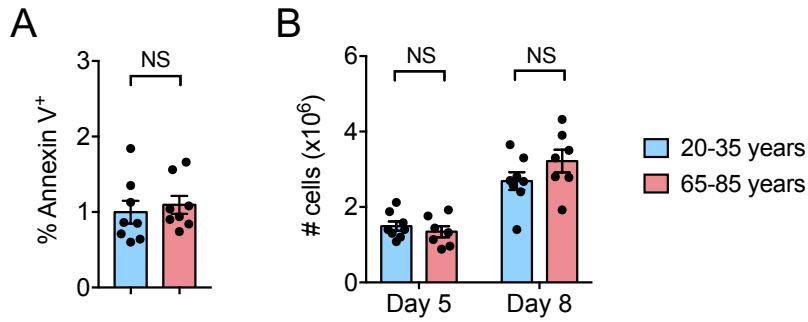

**Supplemental Figure 5. Proliferative responses of naïve CD4 T cells from young and older individuals. Related to Figure 2F.** Naïve CD4 T cells from healthy young and old individuals were activated with beads coated with anti-CD3/anti-CD28 antibodies. **(A)** Summary graph of frequencies of annexin V<sup>+</sup> apoptotic cells on day 5 from 8 young and 8 old adults (mean ± SEM, two-tailed unpaired t test). **(B)** Summary data of the number of cells on day 5 and day 8 after activation from 8 young and 7 old individuals (mean ± SEM, two-way ANOVA followed by Tukey's post-hoc test). NS, not significant.

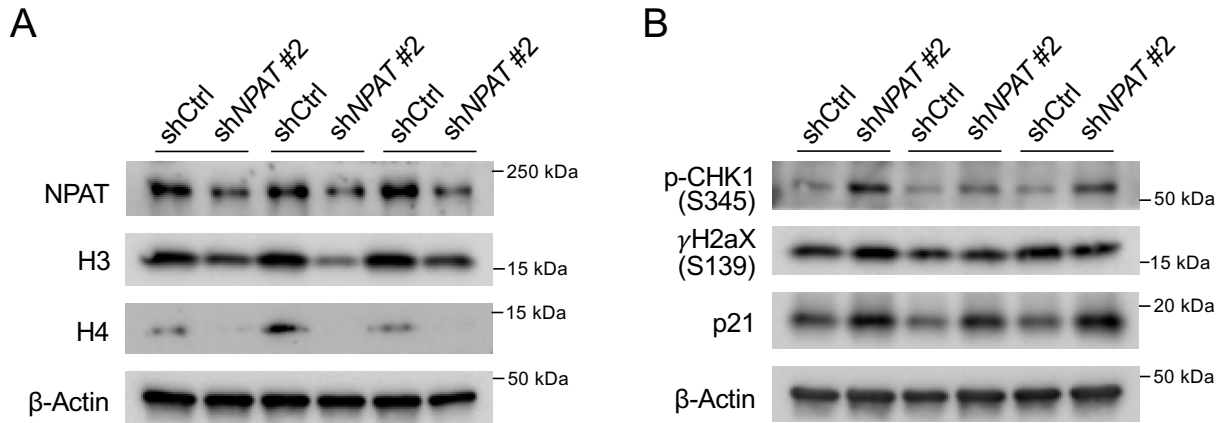

**Supplemental Figure 6. Reduced histone expression promotes replication stress. Related to Figure 3.** Naïve CD4 T cells from three young adults were activated with anti-CD3/anti-CD28 beads and transduced with control shRNA (shCtrl) or *NPAT* shRNA (shNPAT #2) lentivirus for 6 days. Immunoblots for NPAT, histone H3 and H4 (**A**) and p-Chk1 (S345), γH2aX (S139) and p21 (**B**) in lentivirally-transduced GFP<sup>+</sup> cells.

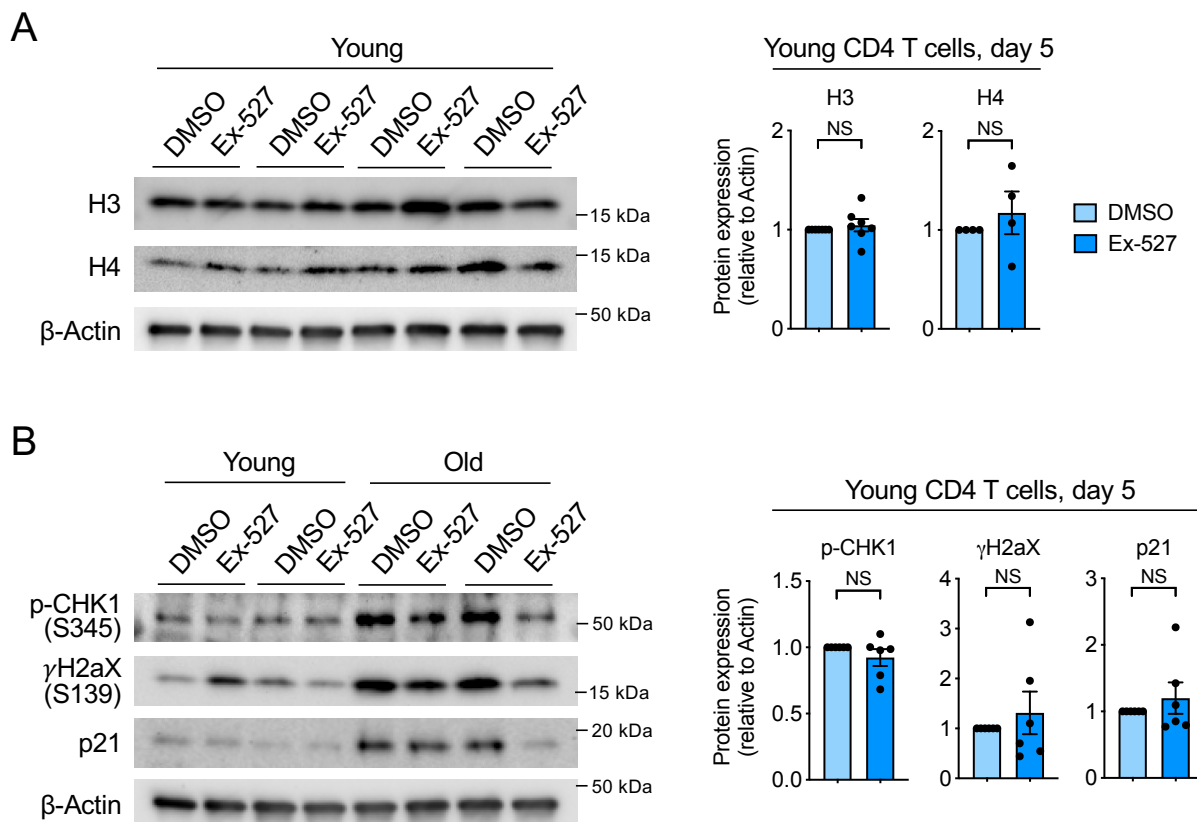

**Supplemental Figure 7. Inhibition of SIRT1 activity in T cell response of young adults.**

Naïve CD4 T cells from young or older individuals were activated with either DMSO or Ex-527 for 5 days. **(A)** Immunoblots of histone H3 and H4 in cycling cells (left) and summary data from 4-7 young adults (right, mean  $\pm$  SEM, two-tailed paired t test). Related to Figure 5G. **(B)** Immunoblots of indicated proteins in cycling young and old cells (left) and summary data from 6 young adults (mean  $\pm$  SEM, two-tailed paired t test). Related to Figure 6B. NS, not significant.

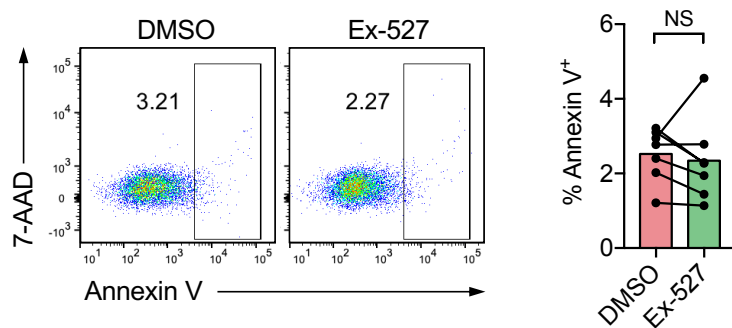

**Supplemental Figure 8. Cell survival after inhibition of SIRT1 activity during T cell**

**activation. Related to Figure 6F.** Naïve CD4 T cells from six old individuals were activated with anti-CD3/CD28 beads for 5 days in the presence of either DMSO or Ex-527. Representative flow plots of Annexin V and 7-AAD staining (left) and summary data of the percentages of Annexin V<sup>+</sup> apoptotic cells (right, mean, two-tailed paired t test). NS, not significant.

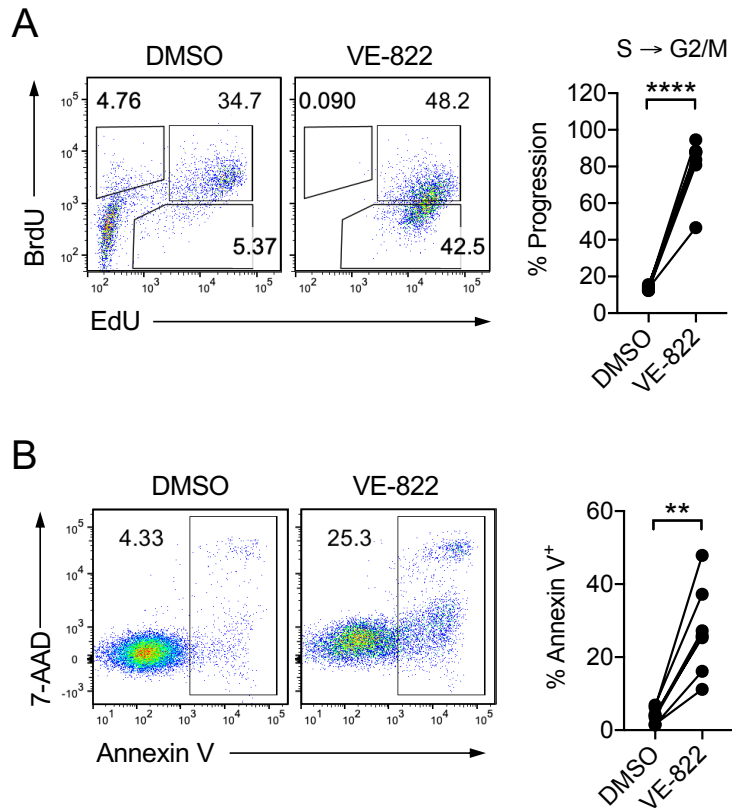

**Supplemental Figure 9. Abrogation of ATR checkpoint accelerates cell cycle progression**

**and increases cell death. Related to Figure 6.** Naïve CD4 T cells from six old individuals were

activated with anti-CD3/CD28 beads for 5 days. The ATR inhibitor VE-822 was added to the culture on day 4. **(A)** On day 5, cells were pulsed with EdU for 2 hours, followed by BrdU for 1 hour. Representative flow plots of BrdU and EdU incorporation (left) and summary graphs of the percentages of BrdU<sup>-</sup> EdU<sup>+</sup> G2/M-phase cells among EdU<sup>+</sup> cells (right, two-tailed paired t test).

**(B)** Representative flow plots of Annexin V and 7-AAD staining (left) and summary data of the percentages of Annexin V<sup>+</sup> apoptotic cells (right, two-tailed paired t test). \*\*P<0.01, \*\*\*\*P<0.0001.

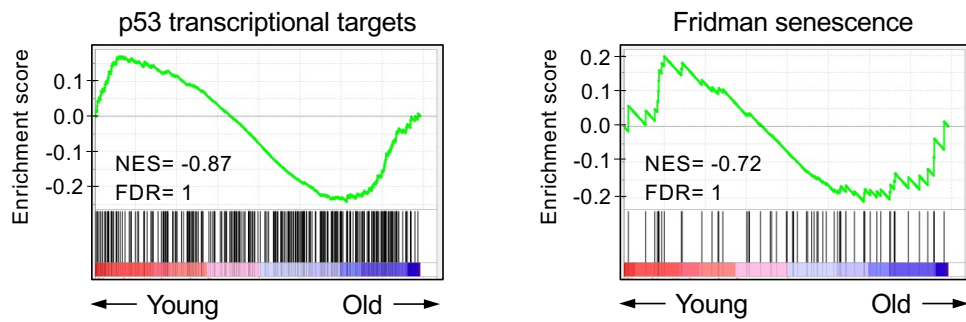

**Supplemental Figure 10. GSEA of the transcriptome of unstimulated naïve CD4 T cells from young and old individuals. Related to Figure 7A.** GSEA of p53 transcriptional target genes and genes related to senescence in the transcriptome of unstimulated young naïve CD4 T cells relative to the expression in old naïve CD4 T cells (accession number SRA: PRJNA638216).

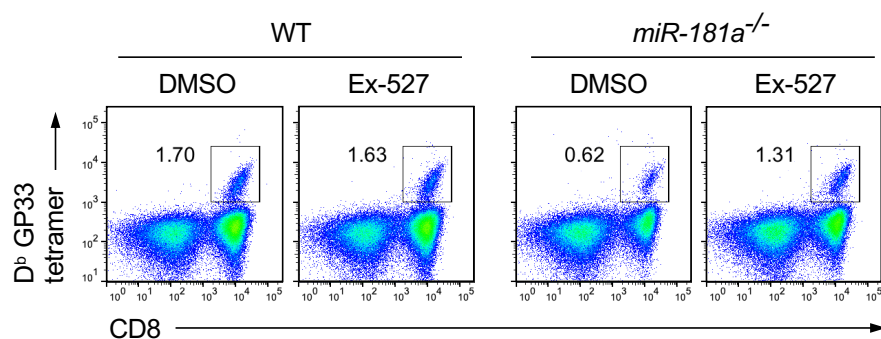

**Supplemental Figure 11. SIRT1 inhibition augments antigen-specific T cell responses in vivo. Related to Figure 8D.** WT and *miR-181a*<sup>-/-</sup> mice were infected with LCMV and given DMSO or Ex-527 daily starting the day after the infection. Representative flow plots of splenic D<sup>b</sup> LCMV GP33 tetramer<sup>+</sup> CD8 T cells on day 7. Summary data of number of tetramer<sup>+</sup> CD8 T cells is shown in Figure 8D. Data are representative of two experiments with 5 mice per group.

**Supplemental Table 1. Oligonucleotide primer sets used in this study.**

| Gene             | Forward                 | Reverse                 |
|------------------|-------------------------|-------------------------|
| <i>HIST1H1B</i>  | CTAAGGAGCGCAATGGCCTTT   | CTTCGGAGTCTTCTTCACTGC   |
| <i>HIST1H2AE</i> | CTACTCCGAACGAGTCGGG     | GATGGTCACGCGACCTAGAAG   |
| <i>HIST2H2AB</i> | CCATCTGCAACTAGCCGTGAG   | CAGGCTTGTGACTCTCCGT     |
| <i>HIST1H2BF</i> | ACCTGCTAAGTCCGCTCCT     | CTACGCTTGCGCTTCTTACCA   |
| <i>HIST1H3A</i>  | ACTGCTCGGAAGTCTACTGGT   | GCGCTGGAAAGGTAGTTTACGA  |
| <i>HIST1H3B</i>  | ATGGCTCGTACTAAACAGACAGC | TTCCGAATCAGCAACTCGGTC   |
| <i>HIST1H3D</i>  | CCATTCCAGCGTCTAGTCCG    | TCTGAAAACGCAGATCAGTCTTG |
| <i>HIST1H4B</i>  | AAGGCGGTAAAGGTTTGGGTA   | GGAAATTGCTTAACCCACC     |
| <i>HIST1H4E</i>  | CCGTAAGGTCCTGCGAGATAA   | AGTCACAGCATCACGAATCAC   |
| <i>HIST1H4H</i>  | GAGGAGCTAAGCGTCATCGC    | ACACCTTCAGAACACCACGAG   |
| <i>TIPIN</i>     | AGAATGGCGTGATTGACCTACC  | CCAGTGCTCCATGTGTCTGATTA |
| <i>CDC6</i>      | TGTTCTCCTCGTGAAAAGCC    | GGGGAGTGTTGCATAGGTTGT   |
| <i>CLSPN</i>     | TGGAGAGTGGGGTCCATTCAT   | CCGGGGTTTACGTTTGAAGAAA  |
| <i>RFC2</i>      | GTGAGCAGGCTAGAGGTCTTT   | TGAGTTCCAACATGGCATCTTTG |
| <i>RFC4</i>      | TTGGGCCTGAACTTTTCCGAT   | AGCGACTTCCTGACACAGTTA   |
| <i>RAD51</i>     | CAACCCATTTACGGTTAGAGC   | TTCTTTGGCGCATAGGCAACA   |
| <i>BHLHE40</i>   | GACGGGGAATAAAGCGGAGC    | CCGGTCACGTCTCTTTTTCTC   |
| <i>LIF</i>       | CCAACGTGACGGACTTCCC     | TACACGACTATGCGGTACAGC   |
| <i>DDIT4</i>     | TGAGGATGAACACTTGTGTGC   | CCAAGTGGCTAGGCATCAGC    |
| <i>AEN</i>       | CTTCCAGGCGCTCAAGTATGT   | GGGCCAGGTCCTTTAGAGAGA   |
| <i>SDC4</i>      | GGACCTCCTAGAAGGCCGATA   | AGGGCCGATCATGGAGTCTT    |
| <i>FOSL1</i>     | CAGGCGGAGACTGACAACTG    | TCCTTCCGGGATTTTGCAGAT   |
| <i>CSF1</i>      | TGGCGAGCAGGAGTATCAC     | AGGTCTCCATCTGACTGTCAAT  |
| <i>CSF2</i>      | TCCTGAACCTGAGTAGAGACAC  | TGCTGCTTGTAGTGGCTGG     |
| <i>CCL3</i>      | AGTTCTCTGCATCACTTGCTG   | CGGCTTCGCTTGGTTAGGAA    |
| <i>CXCL8</i>     | ACTGAGAGTGATTGAGAGTGGAC | AACCCTCTGCACCCAGTTTTTC  |
| <i>IFIT1</i>     | TTGATGACGATGAAATGCCTGA  | CAGGTCACCAGACTCCTCAC    |
| <i>IFIT2</i>     | AAGCACCTCAAAGGGCAAAAC   | TCGGCCCATGTGATAGTAGAC   |
| <i>MX1</i>       | GTTTCCGAAGTGGACATCGCA   | CTGCACAGGTTGTTCTCAGC    |
| <i>IRF5</i>      | GGGCTTCAATGGGTCAACG     | GCCTTCGGTGATTTCCCTG     |
| <i>IRF7</i>      | CCCACGCTATACCATCTACCT   | GATGTCGTCATAGAGGCTGTTG  |
| <i>RSAD2</i>     | CAGCGTCAACTATCACTTCACT  | AACTCTACTTTGCAGAACCTCAC |
| <i>ISG15</i>     | CGCAGATCACCCAGAAGATCG   | TTCGTGCGATTTGTCCACCA    |
| <i>OAS3</i>      | TCTGAGACTCACGTTTCCTGA   | CACTGTTGAGGAGGGTAGAGTA  |
| <i>USP18</i>     | CCTGAGGCAAATCTGTCAGTC   | CGAACACCTGAATCAAGGAGTTA |
| <i>IFI27</i>     | TGCTCTCACCTCATCAGCAGT   | CACAACTCCTCCAATCACAACT  |
| <i>ACTB</i>      | ATGGCCACGGCTGCTTCCAGC   | CATGGTGGTGCCGCCAGACAG   |
